# Supplementary material for: In Vitro and In Silico Acetylcholinesterase Inhibitory Activity of Thalictricavine and Canadine and Their Predicted Penetration across the Blood-Brain Barrier
Source: PubMed Central journal article supplement (PMC6480038; doi:10.3390/molecules24071340), 2019-04-05
Supplement: molecules-24-01340-s001.pdf [file molecules-24-01340-s001.pdf]

*Supplementary Materials*

# ***In Vitro* and *In Silico* Acetylcholinesterase Inhibitory Activity of Thalictricavine and Canadine and Their Predicted Penetration across the Blood-Brain Barrier**

**Jakub Chlebek** <sup>1,\*</sup>, **Jan Korábečný** <sup>2,3</sup>, **Rafael Doležal** <sup>2,4</sup>, **Šárka Štěpánková** <sup>5</sup>, **Daniel I. Pérez** <sup>6</sup>, **Anna Hošťálková** <sup>1</sup>, **Lubomír Opletal** <sup>1</sup>, **Lucie Cahlíková** <sup>1</sup>, **Kateřina Macáková** <sup>1</sup>, **Tomáš Kučera** <sup>3</sup>, **Martina Hrabínová** <sup>2,3</sup> and **Daniel Jun** <sup>2,3</sup>

<sup>1</sup> ADINACO Research Group, Department of Pharmaceutical Botany, Faculty of Pharmacy, Charles University, Akademika Heyrovského 1203, 500 05 Hradec Králové, Czech Republic; HOSTA4AA@faf.cuni.cz (A.H.); opletal@faf.cuni.cz (L.O.); cahlikova@faf.cuni.cz (L.C.); macakovak@faf.cuni.cz (K.M.)

<sup>2</sup> Biomedical Research Center, University Hospital Hradec Králové, Sokolská 581, 500 05 Hradec Králové, Czech Republic; korabecny.jan1@gmail.com (J.K.); rafael.dolezal@gmail.com (R.D.); martina.hrabinova@unob.cz (M.H.); daniel.jun@unob.cz (D.J.)

<sup>3</sup> Department of Toxicology and Military Pharmacy, Faculty of Military Health Sciences, University of Defense, Třebešská 1575, 500 01 Hradec Králové, Czech Republic; tomas.kucera2@unob.cz (T.K.)

<sup>4</sup> Center for Basic and Applied Research, Faculty of Informatics and Management, University of Hradec Králové, Rokitanského 62, 50003 Hradec Králové, Czech Republic

<sup>5</sup> Department of Biological and Biochemical Sciences, Faculty of Chemical Technology, University of Pardubice, Studentská 95, 532 10 Pardubice, Czech Republic; Sarka.Stepankova@upce.cz (Š.Š.)

<sup>6</sup> Centro de Investigaciones Biológicas, Avenida Ramiro de Maetzu 9, 280 40 Madrid, Spain; dperez@cib.csic.es (D.I.P.)

\* Correspondence: jakub.chlebek@faf.cuni.cz; Tel.: +420-495067232; Fax: +420-495067162 (J.C.)

**Table S1.** Permeability in the PAMPA-BBB assay for nine commercial drugs (used in the experiment validation), compounds **1** and **2** and their predictive penetration into the CNS <sup>1</sup>.

| compound       | PAMPA-BBB ( <i>Pe</i> ; 10 <sup>-6</sup> cm.s <sup>-1</sup> ) |                                        | prediction |
|----------------|---------------------------------------------------------------|----------------------------------------|------------|
|                | reported permeability <sup>2</sup>                            | experimental permeability <sup>3</sup> |            |
| atenolol       | 0.8                                                           | 0.1±0.1                                |            |
| caffeine       | 1.3                                                           | 0.3±0.1                                |            |
| desipramine    | 12.0                                                          | 12.7±0.4                               |            |
| enoxacin       | 0.9                                                           | 0.2±0.1                                |            |
| hydrocortisone | 1.9                                                           | 0.7±0.6                                |            |
| piroxicam      | 2.5                                                           | 0.2±0.2                                |            |
| promazine      | 8.8                                                           | 13.3±0.4                               |            |
| testosterone   | 17.0                                                          | 22.5±2.5                               |            |
| verapamil      | 16.0                                                          | 18.5±1.2                               |            |
| <b>1</b>       |                                                               | 2.5 ± 0.1                              | CNS ±      |
| <b>2</b>       |                                                               | 5.0 ± 0.3                              | CNS +      |

<sup>1</sup> PBS/EtOH (70:30) was used as a solvent. <sup>2</sup> Reference (Di et al., 2003). <sup>3</sup> Data are the mean ± SD of three independent experiments.
